# Supplementary material for: Dysregulated Proinflammatory and Fibrogenic Phenotype of Fibroblasts in Cystic Fibrosis
Source: PubMed Central journal article supplement (PMC3667188; doi:10.1371/journal.pone.0064341), 2013-05-29

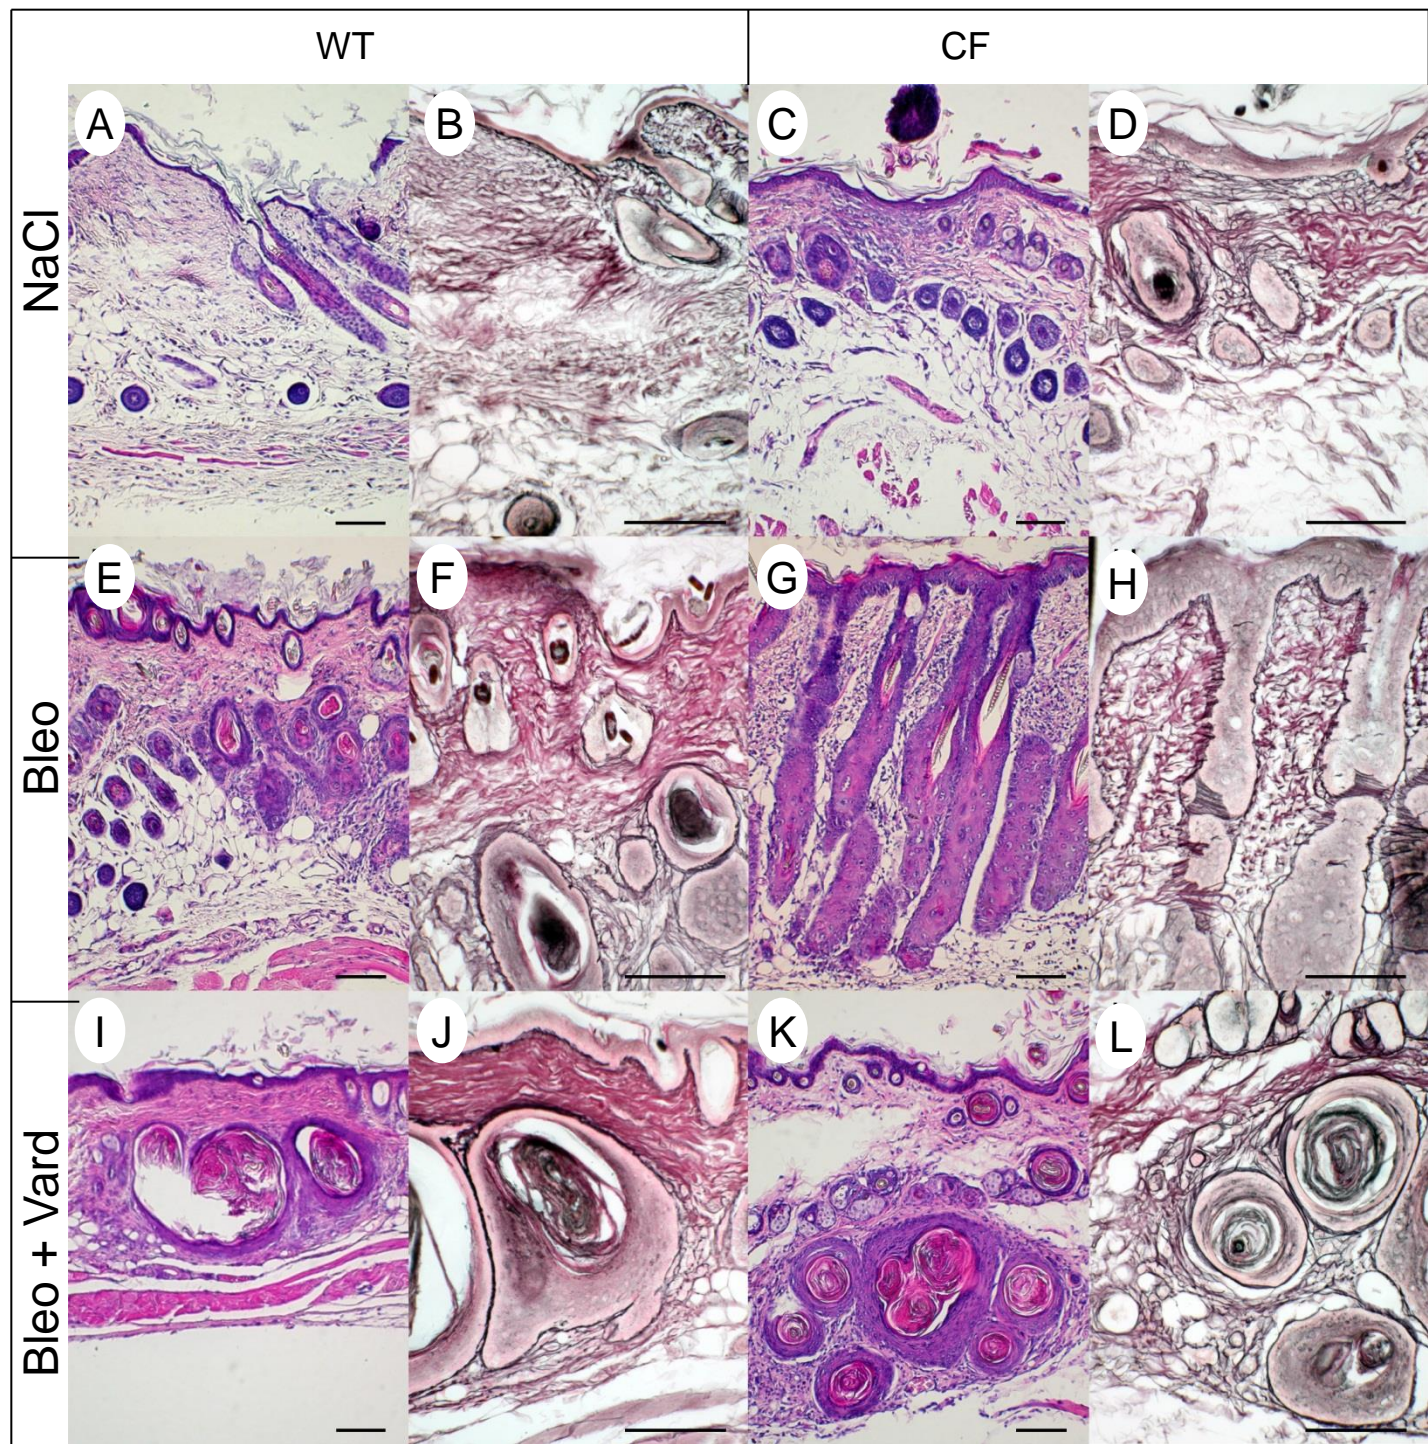

Supplement: pone.0064341.s001.pdf [file pone.0064341.s001.pdf]
